# Supplementary material
Source: publisher figshare collection journal article supplement (https://acs.figshare.com/ndownloader/files/4006993)
Supplement: Supplementary file 1 [file 4006993]

# Tuning the Fermi Level and the Kinetics of Surface States of TiO<sub>2</sub> Nanorods by Means of Ammonia Treatments.

*Cristian Fàbrega,<sup>1,\*</sup> Damián Monllor-Satoca,<sup>1</sup> Santiago Ampudia,<sup>1</sup> Andrés Parra,<sup>1</sup>*

*Teresa Andreu<sup>1</sup> and Joan Ramón Morante<sup>1,2</sup>.*

<sup>1</sup> Catalonia Institute for Energy Research (IREC), Advanced Materials for Energy Department, Jardins de les Dones de Negre 1, 08930 Sant Adrià de Besòs, Spain.

<sup>2</sup> Departament d'Electrònica, Universitat de Barcelona, Martí i 45 Franquès 1, 08028 Barcelona, Spain.

## Supporting Information

### X-Ray Diffraction Spectroscopy

X-ray diffraction (XRD) measurements (Figure S1) revealed that nanorods were grown with a rutile crystalline structure (JCPDS No. 21-1276) with small traces of the anatase polymorph (JCPDS No. 21-1272). It is worthwhile to note, that there are some missing crystallographic plane diffractions from the rutile pattern in our XRD spectra confirming that these nanorods grew following a preferential orientation. Furthermore, several  $\text{SnO}_2$  peaks corresponding to the FTO in the glass substrate (JCPDS No. 41-1445) were also detected in the form of rutile phase, suggesting that the FTO layer acted as a seed for the  $\text{TiO}_2$  nanorod growth that ensured an almost perfect interphase thanks to the matching of both rutile structures. As a matter of fact, a peculiar and interesting unidentified peak appeared between  $\text{SnO}_2$  and  $\text{TiO}_2$  (101) peaks that can be attributed to a solid solution of Sn and Ti oxides formed in the FTO/nanorods interphase.

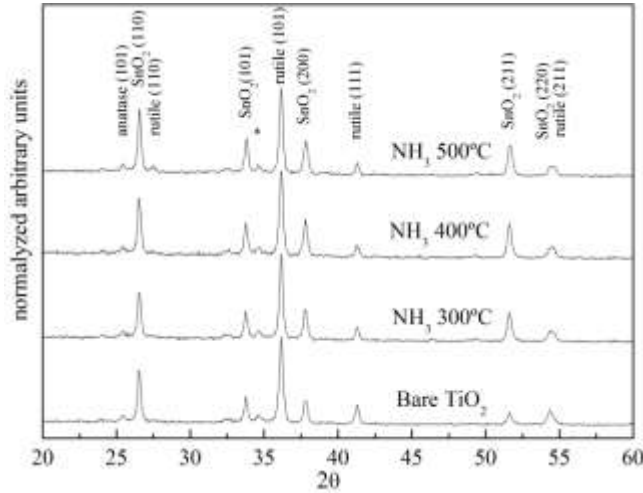

Figure S1. X-ray diffraction spectra of samples treated at different temperatures in ammonia atmosphere.

### Mott-Schottky and EIS measurements.

Mott-Schottky plots from all samples were extracted from the fitting of the data obtained with EIS measurements in the dark and at different voltages (Figure S2). EIS were fitted using two ZARC's elements connected in serial, one corresponding to the depletion region (highlighted with the black square in the Bode phase plots) and to other surface contributions (red square), which are beyond the scope of this article and will be not further discussed. From the Mott-Schottky relationship (eq. S1):

$$\frac{1}{C_{SC}^2} = \frac{2}{N_D \epsilon_0 \epsilon_r} \left[ (E - E_{fb}) - \frac{kT}{e} \right] \rightarrow N_D = \frac{1.41 \times 10^{32}}{\epsilon_r A^2 (\text{slope})} \quad (S1)$$

we can obtain the donor density.

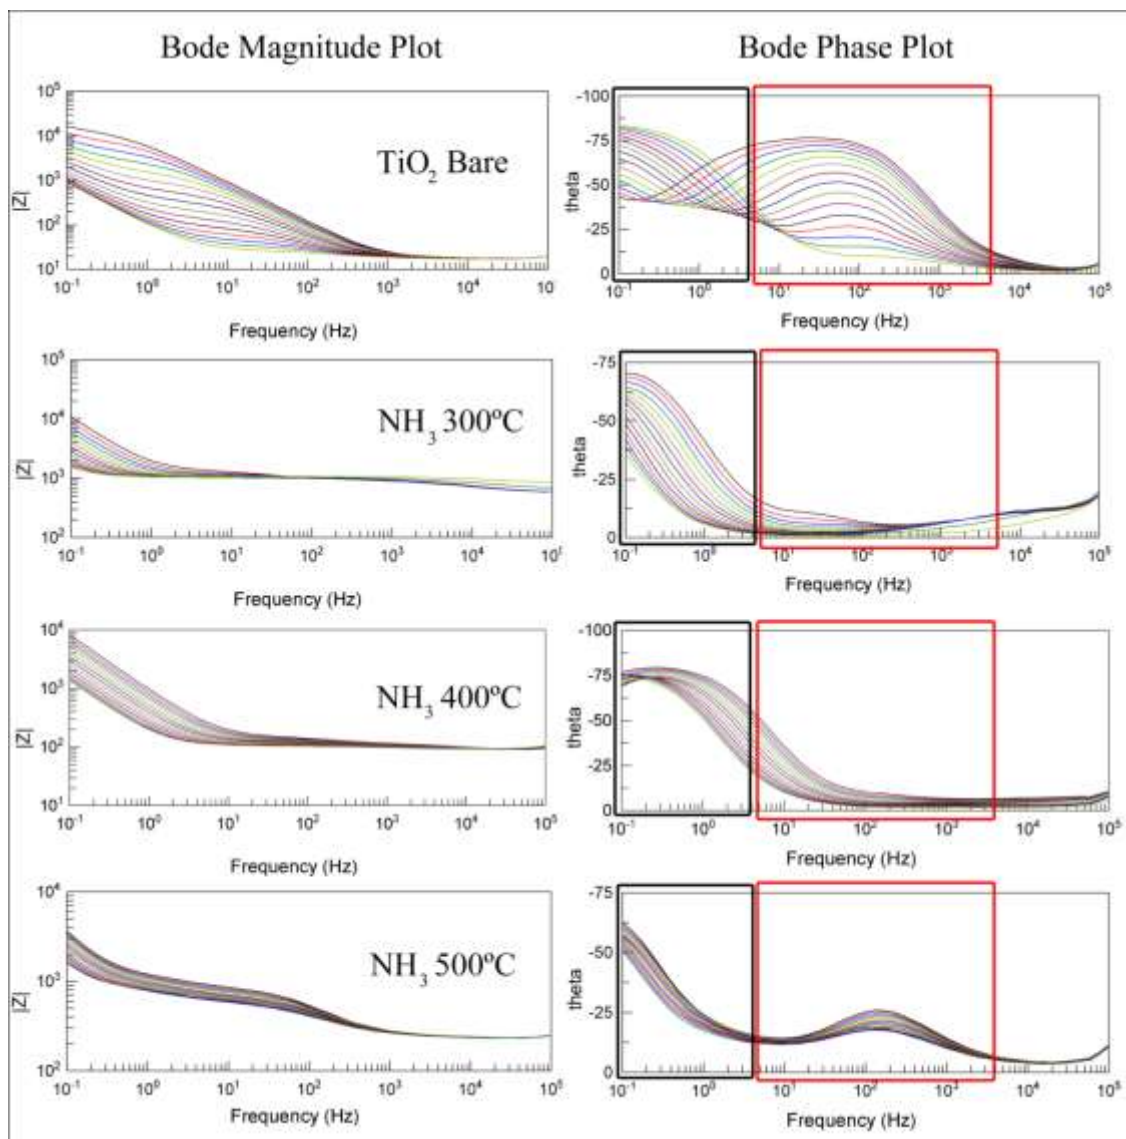

**Figure S2.** Bode plots (Magnitude,  $Z$ , and Phase,  $\theta$ ) of all treated samples within a range of voltages between -950 mV and -600 mV (vs. Ag/AgCl).

## Space Charge Region in Semiconductors: Potential Distribution

### Debye Length

Assuming that both donors and acceptors are fully ionized, the potential ( $\phi(x)$ ) distribution across the semiconductor follows the self-consistent Poisson-Boltzmann equation (eq. S2):

$$\frac{d^2\phi}{dx^2} = -\frac{e}{\epsilon_r\epsilon_0} (p_0 \exp(-e\phi(x)/kT) - n_0 \exp(e\phi(x)/kT) + N_D - N_A) \quad (S2)$$

where  $n_0$  and  $p_0$  are the intrinsic concentrations of electrons and holes, respectively;  $N_D$  and  $N_A$  are the concentrations of ionized electron donor and acceptors, respectively;  $\epsilon_r$  and  $\epsilon_0$  are the relative dielectric constant of the semiconductor (100 for rutile  $\text{TiO}_2$ ) and the vacuum permittivity ( $8.85 \times 10^{-12} \text{ N}^{-1}\text{C}^2\text{m}^{-2}$ ), respectively;  $e$  is the fundamental electric charge ( $1.602 \times 10^{-19} \text{ C}$ );  $k$  is the Boltzmann constant ( $1.38 \times 10^{-23} \text{ J}\cdot\text{K}^{-1}$ ); and  $T$  is the absolute temperature (K). From the electro-neutrality condition in the bulk of the semiconductor (i.e. at  $x \rightarrow \infty$ ) (eq. S3):

$$p_0 + N_D - n_0 - N_A = 0 \quad (S3)$$

Thus, the boundary conditions are (eq. S4):

$$\phi(0) = \phi_{SC} \equiv E - E_{fb}, \quad \left. \frac{d\phi}{dx} \right|_{x \rightarrow \infty} = 0 \quad (S4)$$

If the potential drop at the surface ( $\phi_{SC}$ ) is sufficiently small so that  $|e\phi_{SC}/kT| \ll 1$ , the exponential terms on the right side of Eq. S2 can be expanded as a series and taking into account Eq. S3, the Poisson-Boltzmann equation reduces to (Eq. S5):

$$\frac{d^2\phi}{dx^2} = \frac{e^2}{\epsilon_r\epsilon_0 kT} (p_0 + n_0) \phi(x) \quad (S5)$$

Its analytical solution is easily found (eq. S6):

$$\phi(x) = \phi_{SC} \exp\left(-\frac{x}{L_D}\right) \quad (S6)$$

where  $L_D$  is known as the Debye length and is given by (eq. S7):

$$L_D = \sqrt{\frac{\epsilon_r\epsilon_0 kT}{e^2(n_0 + p_0)}} \quad (S7)$$

In our particular case, as  $N_D \approx n_0 + p_0$ , eq. S7 can be finally written as (eq. S8):

$$L_D \approx \sqrt{\frac{\epsilon_r\epsilon_0 kT}{e^2 N_D}} \quad (S8)$$

### ***Depletion Layer Width***

Another important case for which eq. S2 can be solved analytically is that of a relatively heavily doped  $n$ -type semiconductor with a negative surface potential so that a significant depletion layer is formed. In this case, the  $N_D$  term on the right-hand side of the eq. S2 dominates, reducing to (eq. S9):

$$\frac{d^2\phi}{dx^2} = -\frac{eN_D}{\epsilon_r\epsilon_0} \quad (S9)$$

Assuming that out from the depletion region (i.e.  $x > W$ ) the electric field is negligible, the boundary conditions are (eq. S10):

$$\phi(W) = 0, \quad \left. \frac{d\phi}{dx} \right|_{x=W} = 0 \quad (S10)$$

In addition, also considering that  $\phi(0) = \phi_{SC}$ , we can solve the above differential equation, yielding (eq. S11):

$$\phi(x) = \begin{cases} -\frac{eN_D}{\epsilon_r\epsilon_0}(x-W)^2, & 0 \leq x \leq W \\ 0, & x \geq W \end{cases} \quad (S11)$$

where the depletion layer thickness ( $w$ ) is given by (eq. S12):

$$W = \sqrt{\frac{2\epsilon_r\epsilon_0|\phi_{SC}|}{e^2N_D}} \quad (S12)$$
